# Supplementary material for: Rainfall interception and redistribution by a common North American understory and pasture forb, Eupatorium capillifolium (Lam. dogfennel)
Source: Copernicus journal article supplement (doi:10.5194/hess-2019-579), 2019-11-05
Supplement: Supplementary file 1 [file hess-2019-579-supplement.pdf]

Supplemental Materials for:

## Rainfall interception and redistribution by a common North American understory and pasture forb, *Eupatorium capillifolium* (dogfennel)

D.A.R. Gordon<sup>1</sup>, A.M.J. Coenders-Gerrits<sup>2</sup>, B.A. Sellers<sup>3,4</sup>, S.M.M. Sadeghi<sup>5</sup>, J.T. Van Stan II<sup>1,6</sup>

<sup>1</sup>Geology & Geography, Georgia Southern University, Statesboro, GA, USA

<sup>2</sup>Water Management, Delft University of Technology, The Netherlands

<sup>3</sup>Agronomy, University of Florida, Gainesville, FL, USA

<sup>4</sup>Range Cattle Research & Education Center, Institute of Food & Agricultural Sciences, FL, USA

<sup>5</sup>Department of Forestry & Forest Economics, University of Tehran, Karaj, Iran

<sup>6</sup>Applied Coastal Research Lab, Georgia Southern University, Savannah, GA, USA

Correspondence to: John T. Van Stan ([jvanstan@georgiasouthern.edu](mailto:jvanstan@georgiasouthern.edu))

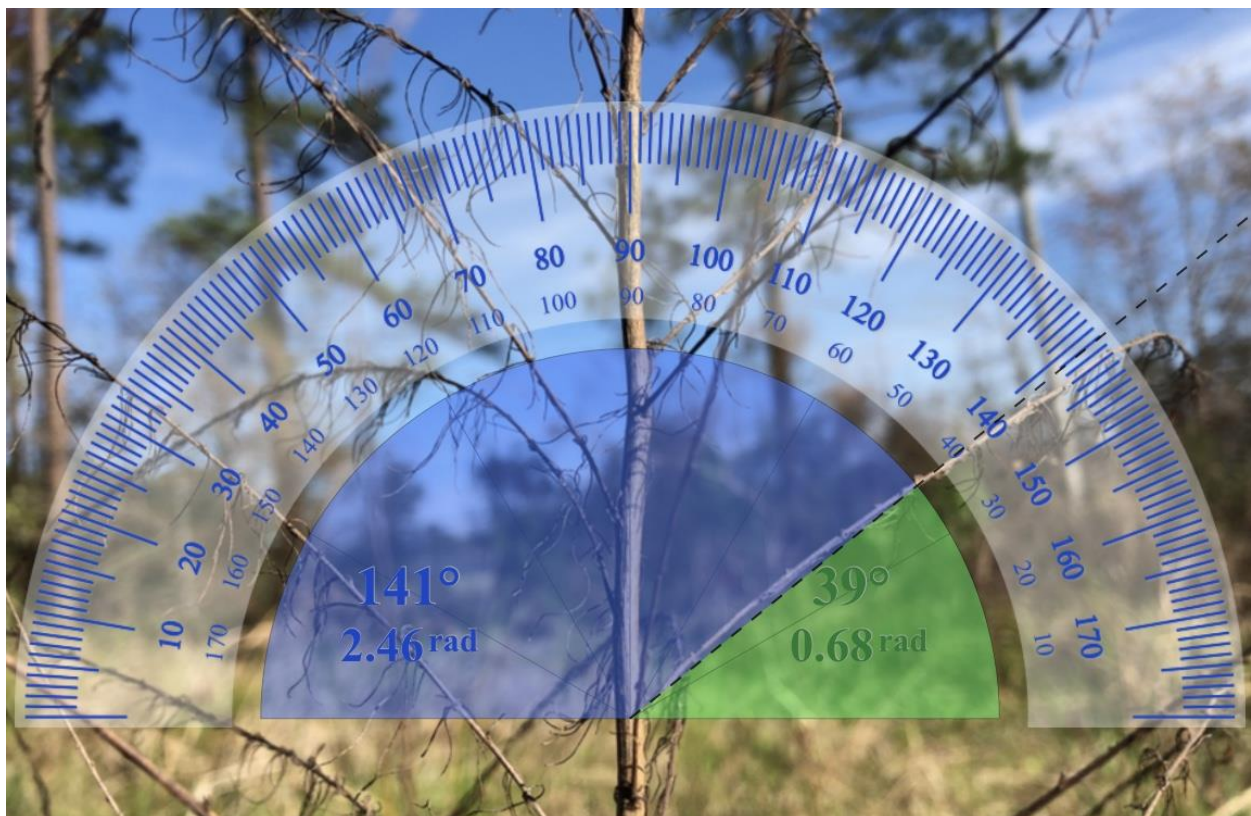

**Figure S1.** An example screenshot showing how leaf angle at the stem was determined with the iProtactor App for iPhone (2013, Phoenix Solutions).

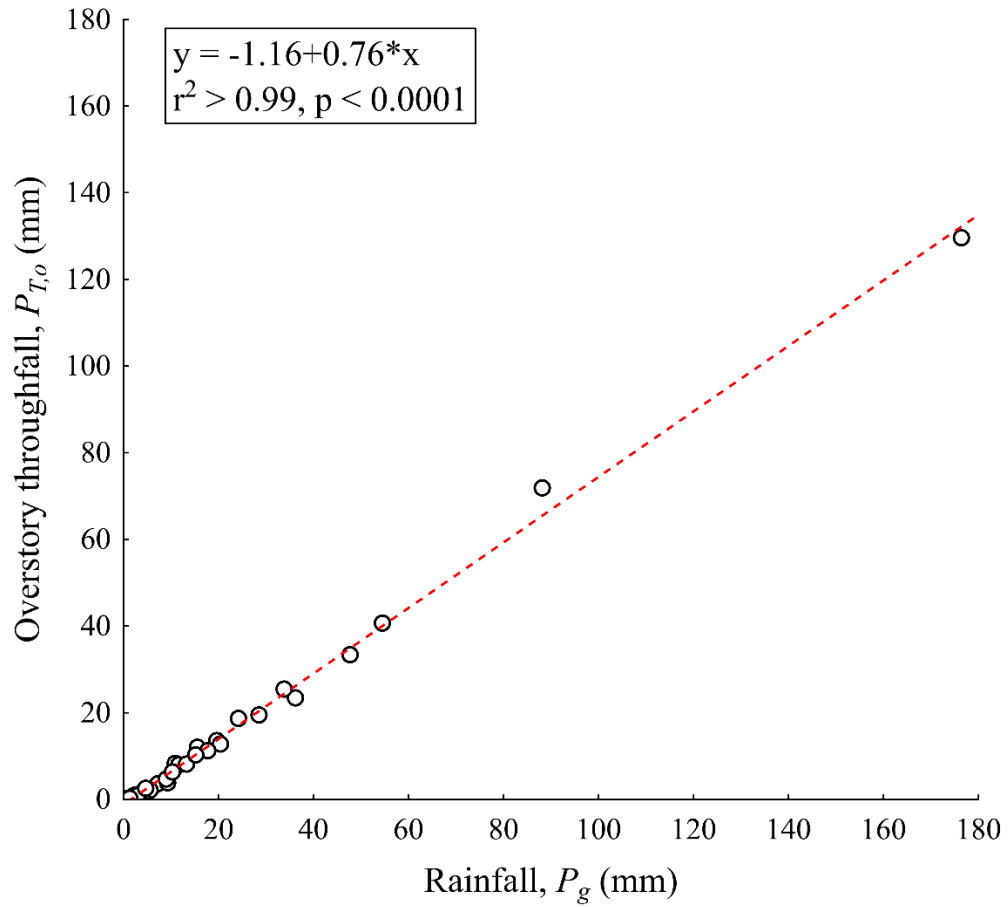

**Figure S2.** Overstory throughfall ( $P_{T,o}$ ) in relation to above-canopy gross rainfall ( $P_g$ ) at the study site, derived from field data (Mesta et al., 2017; cited in manuscript).

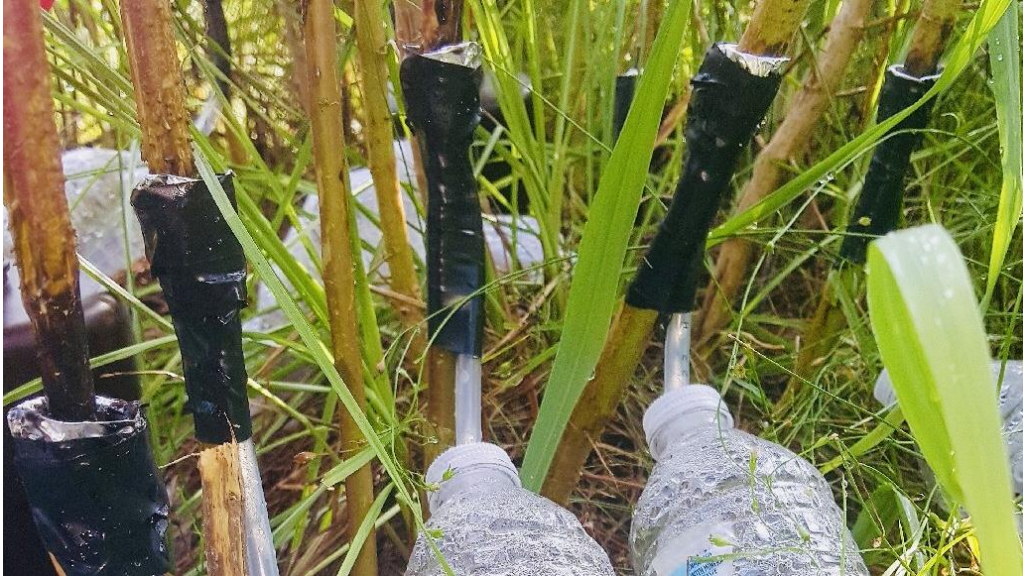

**Figure S3.** Photograph of the dogfennel stemflow collars.

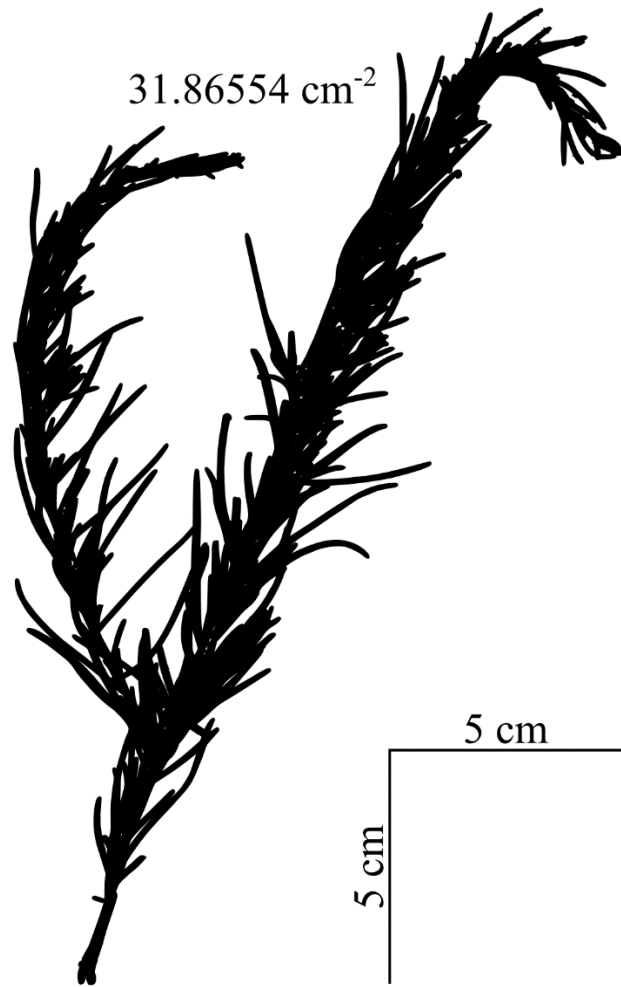

**Figure S4.** Example scanned, flattened leaf vectorized via Inkscape (v. 0.92, Inkscape.org) for surface area estimation.
